# Supplementary material
Source: MDPI journal article supplement (https://www.mdpi.com/2071-1050/10/11/4215)
Supplement: s1 [file s1]

# German Winegrowers' Motives and Barriers to Convert to Organic Farming

## Supplementary 1: Literature analyzed

Day of search 22 January 2016

Search items in Scopus: (TITLE-ABS-KEY (“organic farming” OR “organic production” OR “organic label\*” OR “organic certificat\*”) AND (TITLE-ABS-KEY (conversion OR converting OR reversion OR withdrawal)) AND (TITLE-ABS-KEY (decision-making OR motives OR objectives OR motivation OR preferences)) AND (DOCTYPE (ar OR re))

Search items in Web of Science: TOPIC: (“organic farming” OR “organic production” OR “organic label\*” OR “organic certificat\*”) AND TOPIC: (conversion OR converting OR reversion OR withdrawal) AND TOPIC: (decision-making OR motives OR objectives OR motivation OR preferences). Timespan: 2000–2016.

**Table S1.** Literature Analyzed: 101 publications from the search items and the resulting 18 relevant articles.

| Authors                                                                                | Title                                                                                                                              | Year | Source                 | Relevance |
|----------------------------------------------------------------------------------------|------------------------------------------------------------------------------------------------------------------------------------|------|------------------------|-----------|
| Bartulović, A., Kozorog, M.                                                            | Taking up organic farming in (pre-)Alpine Slovenia: Contrasting motivations of dairy farmers from less-favoured agricultural areas | 2014 | Scopus, Web of Science | relevant  |
| Best, Henning                                                                          | Organic farming as a rational choice: empirical investigations in environmental decision making                                    | 2009 | Web of Science         | relevant  |
| Darnhofer, I., Schneeberger, W., Freyer, B.                                            | Converting or not converting to organic farming in Austria: Farmer types and their rationale                                       | 2005 | Scopus, Web of Science | relevant  |
| de Lauwere, CC; Drost, H; de Buck, AJ; Smit, AB; Balk-Theuws, LW; Buurma, JS; Prins, H | To change or not to change? Farmers' motives to convert to integrated or organic farming (or not)                                  | 2004 | Web of Science         | relevant  |
| Flaten, O., Lien, G., Ebbesvik, M., Koesling, M., Valle, P.S.                          | Do the new organic producers differ from the 'old guard'? Empirical results from Norwegian dairy farming                           | 2006 | Scopus, Web of Science | relevant  |
| Kallas, Z., Serra, T., Gil, J.M.                                                       | Farmers' objectives as determinants of organic farming adoption: The case of Catalanian vineyard production                        | 2010 | Scopus, Web of Science | relevant  |
| Kaufmann, P., Zemeckis, R., Skulskis, V., Kairyte, E., Stagl, S.                       | The diffusion of organic farming in Lithuania                                                                                      | 2011 | Scopus, Web of Science | relevant  |
| Koesling, M., Flaten, O., Lien, G.                                                     | Factors influencing the conversion to organic farming in Norway                                                                    | 2008 | Scopus, Web of Science | relevant  |
| Konig, B                                                                               | Adoption of sustainable production techniques: Structural and social determinants of the individual decision making process        | 2004 | Web of Science         | relevant  |
| Kubala, J.; Grodzinska-Jurczak, M.; Cichon, M.; Nieszporek, K.                         | Motivations for organic farming among farmers from Malopolska Province, Poland                                                     | 2008 | Web of Science         | relevant  |
| Laepple, Doris; Kelley, Hugh                                                           | Understanding the uptake of organic farming: Accounting for heterogeneities among Irish farmers                                    | 2013 | Web of Science         | relevant  |
| Madelrieux, S., Alavoine-Mornas, F.                                                    | Withdrawal from organic farming in France                                                                                          | 2013 | Scopus, Web of Science | relevant  |
| Mzoughi, Naoufel                                                                       | Farmers adoption of integrated crop protection and organic farming: Do moral and social concerns matter?                           | 2011 | Web of Science         | relevant  |
| Rozman, Č., Pažek, K.,                                                                 | The dynamic simulation of organic farming                                                                                          | 2013 | Scopus,                | relevant  |

|                                                                                       |                                                                                                                                                                                                   |      |                        |              |
|---------------------------------------------------------------------------------------|---------------------------------------------------------------------------------------------------------------------------------------------------------------------------------------------------|------|------------------------|--------------|
| Kljajić, M., Bavec, M., Turk, J., Bavec, F., Kofjač, D., Škraba, A.                   | development scenarios—A case study in Slovenia                                                                                                                                                    |      | Web of Science         |              |
| Sahm, H., Sanders, J., Nieberg, H., Behrens, G., Kuhnert, H., Strohm, R., Hamm, U.    | Reversion from organic to conventional agriculture: A review                                                                                                                                      | 2013 | Scopus, Web of Science | relevant     |
| Smith, E., Marsden, T.                                                                | Exploring the 'limits to growth' in UK organics: Beyond the statistical image                                                                                                                     | 2004 | Scopus, Web of Science | relevant     |
| Tranter, R.B., Holt, G.C., Grey, P.T.                                                 | Budgetary implications of, and motives for, converting to organic farming: Case study farm business evidence from Great Britain                                                                   | 2007 | Scopus, Web of Science | relevant     |
| Tress B.                                                                              | Converting to organic agriculture—Danish farmers' views and motivations                                                                                                                           | 2001 | Scopus                 | relevant     |
| Acs, S., Berentsen, P., Huirne, R., van Asseldonk, M.                                 | Effect of yield and price risk on conversion from conventional to organic farming                                                                                                                 | 2009 | Scopus                 | not relevant |
| Acs, S., Berentsen, P.B.M., Huirne, R.B.M.                                            | Conversion to organic arable farming in The Netherlands: A dynamic linear programming analysis                                                                                                    | 2007 | Scopus, Web of Science | not relevant |
| Aoki, M.                                                                              | Motivations for organic farming in tourist regions: A case study in Nepal                                                                                                                         | 2014 | Scopus, Web of Science | not relevant |
| Bachmann, F.                                                                          | Potential and limitations of organic and fair trade cotton for improving livelihoods of smallholders: Evidence from Central Asia                                                                  | 2012 | Scopus, Web of Science | not relevant |
| Baquero, G.; Esteban, B.; Rius, A.; Puig, R.; Riba, J.-R.                             | Comparative life cycle analysis between traditional and organic farming local rotations to produce straight vegetable oil used as self-supply biofuel in agriculture                              | 2012 | Web of Science         | not relevant |
| Bellon, Stephane; Lamine, Claire                                                      | Conversion to Organic Farming: A Multidimensional Research Object at the Crossroads of Agricultural and Social Sciences—A Review                                                                  | 2009 | Web of Science         | not relevant |
| Berentsen, P.B.M.; Kovacs, K.; van Asseldonk, M.A.P.M.                                | Comparing risk in conventional and organic dairy farming in the Netherlands: An empirical analysis                                                                                                | 2012 | Web of Science         | not relevant |
| Cranfield, J., Henson, S., Holliday, J.                                               | The motives, benefits, and problems of conversion to organic production                                                                                                                           | 2010 | Scopus, Web of Science | not relevant |
| Demiryürek, K.                                                                        | Conversion to organic hazelnut production in the black sea region of Turkey                                                                                                                       | 2001 | Scopus, Web of Science | not relevant |
| Ekelund, L.; Fernqvist, F.                                                            | Organic as a diversification into sustainable apple production on the Swedish market                                                                                                              | 2008 | Web of Science         | not relevant |
| Fedele, Andrea; Mazzi, Anna; Niero, Monia; Zuliani, Filippo; Scipioni, Antonio        | Can the Life Cycle Assessment methodology be adopted to support a single farm on its environmental impacts forecast evaluation between conventional and organic production? An Italian case study | 2014 | Web of Science         | not relevant |
| Fisher, M.W.; Small, B.H.; Mackay, A.D.; Kenny, G.J.; Jerebine, B.C.; Parminter, T.G. | Understanding shepherding within lambing, and organic farming systems through acknowledging cultural, community and individual influences                                                         | 2004 | Web of Science         | not relevant |
| Geven, CGM                                                                            | Economic perspectives of organic vegetable farms in the Netherlands                                                                                                                               | 2000 | Web of Science         | not relevant |
| Guesmi, B.; Serra, T.; Kallas, Z.; Gil Roig, J.M.                                     | The productive efficiency of organic farming: the case of grape sector in Catalonia                                                                                                               | 2012 | Web of Science         | not relevant |
| Hermansen, J.E.                                                                       | Organic livestock production systems and appropriate development in relation to public expectations                                                                                               | 2003 | Web of Science         | not relevant |
| Huxham, S.K., Sparkes, D.L., Wilson, P.                                               | The effect of conversion strategy on the yield of the first organic crop                                                                                                                          | 2005 | Scopus, Web of Science | not relevant |
| Karlen, D.L., Cambardella, C.A., Bull, C.T., Chase, C.A., Gibson, L.R., Delate, K.    | Producer-researcher interactions in on-farm research: A case study on developing a certified organic research site                                                                                | 2007 | Scopus, Web of Science | not relevant |
| Kavargiris, S.E., Mamolos,                                                            | Energy resources' utilization in organic and                                                                                                                                                      | 2009 | Scopus                 | not relevant |

|                                                                                            |                                                                                                                                                                                                                                                                                                                                                     |      |                        |              |
|--------------------------------------------------------------------------------------------|-----------------------------------------------------------------------------------------------------------------------------------------------------------------------------------------------------------------------------------------------------------------------------------------------------------------------------------------------------|------|------------------------|--------------|
| A.P., Tsatsarelis, C.A., Nikolaidou, A.E., Kalburtji, K.L.                                 | conventional vineyards: Energy flow, greenhouse gas emissions and biofuel production                                                                                                                                                                                                                                                                |      |                        |              |
| Koorberg, Pille; Lahesoo, Katri; Mikk, Merit                                               | Evaluation of the socio-economic impacts of an agri-environment support scheme upon organic farming in Estonia                                                                                                                                                                                                                                      | 2005 | Web of Science         | not relevant |
| Kratochvil, R., Kaliski, O., Dorninger, M., Hambrusch, J., Freyer, B.                      | Farm management and economic effects of organic intensive livestock farming in the region Mostviertel-Eisenwurzen (A) [Betriebs- und volkswirtschaftliche effekte einer großflächigen bewirtschaftung nach den prinzipien des ökologischen landbaus II—Dargestellt am beispiel von veredelungsbetrieben in der region mostviertel-eisenwurzen (NÖ)] | 2004 | Scopus, Web of Science | not relevant |
| Kratochvil, R., Kaliski, O., Kirner, L., Freyer, B.                                        | Farm management and economic effects of organic milk production in the region Mostviertel-Eisenwurzen (A) [Betriebs- und volkswirtschaftliche effekte einer großflächigen bewirtschaftung nach den prinzipien des ökologischen landbaus—Dargestellt am beispiel der milchproduktion in der region Mostviertel-Eisenwurzen (NÖ)]                     | 2003 | Scopus, Web of Science | not relevant |
| Lamine, C., Bellon, S.                                                                     | Conversion to organic farming: A multidimensional research object at the crossroads of agricultural and social sciences. A review                                                                                                                                                                                                                   | 2009 | Scopus, Web of Science | not relevant |
| Lampkin, N                                                                                 | From conversion payments to integrated action plans in the European Union                                                                                                                                                                                                                                                                           | 2003 | Web of Science         | not relevant |
| Navntoft, Soren; Esbjerg, Peter; Jensen, Anne-Mette M.; Johnson, Ib; Petersen, Bo Svenning | Flora and fauna changes during conversion from conventional to organic farming.                                                                                                                                                                                                                                                                     | 2003 | Web of Science         | not relevant |
| Reidsma, P; Tekelenburg, T; van den Berg, M; Alkemade, R                                   | Impacts of land-use change on biodiversity: An assessment of agricultural biodiversity in the European Union                                                                                                                                                                                                                                        | 2006 | Web of Science         | not relevant |
| Rozman, Č., Kljajić, M., Škraba, A.                                                        | System dynamics model for conversion to organic farming                                                                                                                                                                                                                                                                                             | 2015 | Scopus                 | not relevant |
| Smit, A.A.H., Driessen, P.P.J., Glasbergen, P.                                             | Conversion to organic dairy production in the netherlands: Opportunities and constraints                                                                                                                                                                                                                                                            | 2009 | Scopus, Web of Science | not relevant |
| Zeiger, M., Fohrer, N.                                                                     | Impact of organic farming systems on runoff formation processes-A long-term sequential rainfall experiment                                                                                                                                                                                                                                          | 2009 | Scopus, Web of Science | not relevant |
| Zinati, GM                                                                                 | Transition from conventional to organic farming systems: I. Challenges, recommendations, and guidelines for pest management                                                                                                                                                                                                                         | 2002 | Web of Science         | not relevant |
| Albrecht, Harald; Auerswald, Karl                                                          | Seed traits in arable weed seed banks and their relationship to land-use changes                                                                                                                                                                                                                                                                    | 2009 | Web of Science         | not relevant |
| Allaire, G., Poméon, T., Maigné, E., Cahuzac, E., Simioni, M., Desjeux, Y.                 | Territorial analysis of the diffusion of organic farming in France: Between heterogeneity and spatial dependence                                                                                                                                                                                                                                    | 2014 | Scopus                 | not relevant |
| Alroe, HF; Kristensen, ES                                                                  | Researching alternative, sustainable agricultural systems. a Modeling approach by examples from Denmark                                                                                                                                                                                                                                             | 2001 | Web of Science         | not relevant |
| Altenbuchner, C., Larcher, M., Vogel, S.                                                   | The impact of organic cotton cultivation on the livelihood of smallholder farmers in Meatu district, Tanzania                                                                                                                                                                                                                                       | 2014 | Scopus                 | not relevant |
| Asadollahpour, A., Najafabadi, M.O., Hosseini, S.J.                                        | Modeling behavior pattern of Iranian organic paddy farmers                                                                                                                                                                                                                                                                                          | 2016 | Scopus                 | not relevant |
| Avasthe, R.K., Bhutia, T.T., Pradhan, Y., Das, K.                                          | Mountain production system analysis—A case study from Chalumthang, South Sikkim, India                                                                                                                                                                                                                                                              | 2005 | Scopus, Web of Science | not relevant |
| Berner, A., Hildermann, I., Fließbach, A., Pfiffner, L., Niggli, U., Mäder, P.             | Crop yield and soil fertility response to reduced tillage under organic management                                                                                                                                                                                                                                                                  | 2008 | Scopus, Web of Science | not relevant |

|                                                                                                                        |                                                                                                                                                                                                         |      |                        |              |
|------------------------------------------------------------------------------------------------------------------------|---------------------------------------------------------------------------------------------------------------------------------------------------------------------------------------------------------|------|------------------------|--------------|
| Boys, Kathryn A.; Willis, David B.; Carpio, Carlos E.                                                                  | Consumer willingness to pay for organic and locally grown produce on Dominica: insights into the potential for an "Organic Island"                                                                      | 2014 | Web of Science         | not relevant |
| Caporali, Fabio                                                                                                        | Agroecology as a Transdisciplinary Science for a Sustainable Agriculture                                                                                                                                | 2010 | Web of Science         | not relevant |
| Cicia, G., Del Giudice, T., Ramunno, I.                                                                                | Environmental and health components in consumer perception of organic products: Estimation of willingness to pay                                                                                        | 2009 | Scopus, Web of Science | not relevant |
| Coll, P., Le Cadre, E., Blanchart, E., Hinsinger, P., Villenave, C.                                                    | Organic viticulture and soil quality: A long-term study in Southern France                                                                                                                              | 2011 | Scopus, Web of Science | not relevant |
| Coll, P., Le Cadre, E., Villenave, C.                                                                                  | How are nematode communities affected during a conversion from conventional to organic farming in southern French vineyards?                                                                            | 2012 | Scopus, Web of Science | not relevant |
| Da Silva, G.F., Santos, D., Da Silva, A.P., De Souza, J.M.                                                             | Soil quality indicators under different land use systems in the Agreste region of Paraíba, Brazil [Indicadores de qualidade do solo sob diferentes sistemas de uso na mesorregião do agreste paraibano] | 2015 | Scopus, Web of Science | not relevant |
| Dalgaard, T., Kjeldsen, C., Hutchings, N.J., Hansen, J.F.                                                              | N-losses and energy use in a scenario for conversion to organic farming.                                                                                                                                | 2001 | Scopus, Web of Science | not relevant |
| De Almeida Theodoro, V.C., Mendes, A.N.G., Guimarães, R.J.                                                             | Response of coffee crop ( <i>Coffea arabica</i> L.) in agroecologic transition to diferent soil management [Resposta de lavouras cafeiras em transição agroecológica a diferentes manejos de solo]      | 2009 | Scopus                 | not relevant |
| De Cock, L.; Lauwers, L.; de Wit, J.                                                                                   | A Critical View on Direct Area Payments to Organic Vegetable Producers                                                                                                                                  | 2012 | Web of Science         | not relevant |
| de Freitas, Idelfonso C.; dos Santos, Felipe C. V.; Custodio Filho, Ronaldo de O.; Correchel, Vladia; da Silva, Ruy B. | Agroecosystems of family production in the Amazon and its impacts on soil attributes                                                                                                                    | 2013 | Web of Science         | not relevant |
| De Souza, J.L., Casali, V.W.D., Santos, R.H.S., Cecon, P.R.                                                            | Energetic balance and sustainability analysis in the organic production of vegetable crops [Balanço e análise da sustentabilidade energética na produção orgânica de hortaliças]                        | 2008 | Scopus, Web of Science | not relevant |
| Demattê Filho, L.C., Pereira, D.C.O., Possamai, E.                                                                     | Dietary supplementation of alternative methionine and choline sources in the organic broiler production in Brazil                                                                                       | 2015 | Scopus, Web of Science | not relevant |
| Desjeux, Y., Dupraz, P., Kuhlman, T., Paracchini, M.L., Michels, R., Maigné, E., Reinhard, S.                          | Evaluating the impact of rural development measures on nature value indicators at different spatial levels: Application to France and the Netherlands                                                   | 2014 | Scopus, Web of Science | not relevant |
| Di Felice, V., Mancinelli, R., Proulx, R., Campiglia, E.                                                               | A multivariate analysis for evaluating the environmental and economical aspects of agroecosystem sustainability in central Italy                                                                        | 2012 | Scopus                 | not relevant |
| Euclides, K                                                                                                            | Supply chain approach to sustainable beef production from a Brazilian perspective                                                                                                                       | 2004 | Web of Science         | not relevant |
| Finnan, John; Styles, David                                                                                            | Hemp: A more sustainable annual energy crop for climate and energy policy                                                                                                                               | 2013 | Web of Science         | not relevant |
| Freitas, I.C., Santos, F.C.V., Custódio Filho, R.O., Correchel, V., Silva, R.B.                                        | Agroecosystems of family production in the Amazon and its impacts on soil attributes [Agroecossistemas de produção familiar da Amazônia e seus impactos nos atributos do solo]                          | 2013 | Scopus                 | not relevant |
| Ilbery, B., Holloway, L., Arber, R.                                                                                    | The geography of organic farming in England and Wales in the 1990s                                                                                                                                      | 1999 | Scopus                 | not relevant |
| Jonsson, Asa; Nybom, Hilde; Rumpunen, Kimmo                                                                            | Fungal Disease and Fruit Quality in an Apple Orchard Converted from Integrated Production to Organic Production                                                                                         | 2010 | Web of Science         | not relevant |
| Kirchmann, Holger; Bergstrom, Lars; Katterer, Thomas; Andren, Olof; Andersson, Rune                                    | Can Organic Crop Production Feed the World?                                                                                                                                                             | 2008 | Web of Science         | not relevant |
| López, L.I., V. Davier, Z., Deblitz, C.                                                                                | International competitiveness of organic beef production in Germany                                                                                                                                     | 2005 | Scopus, Web of Science | not relevant |

|                                                                                                                                                                                                                      |                                                                                                                                          |      | Science                   |              |  |
|----------------------------------------------------------------------------------------------------------------------------------------------------------------------------------------------------------------------|------------------------------------------------------------------------------------------------------------------------------------------|------|---------------------------|--------------|--|
| Lozano-Garcia, B.;<br>Parras-Alcantara, L.                                                                                                                                                                           | Land use and management effects on carbon and nitrogen in Mediterranean Cambisols                                                        | 2013 | Web of Science            | not relevant |  |
| Maxwell, A., McKeegan, D.,<br>Ellis, K.A.                                                                                                                                                                            | Extended suckling systems for dairy calves: Is this possible for organic dairy farmers?                                                  | 2006 | Scopus                    | not relevant |  |
| Möller, K., Stinner, W.                                                                                                                                                                                              | Effects of organic wastes digestion for biogas production on mineral nutrient availability of biogas effluents                           | 2010 | Scopus,<br>Web of Science | not relevant |  |
| Moumouni, I., Baco, M.N.,<br>Tovignan, S., Gbèdo, F.,<br>Nouatin, G.S., Vodouhè,<br>S.D., Liebe, U.                                                                                                                  | What happens between technico-institutional support and adoption of organic farming? A case study from Benin                             | 2013 | Scopus                    | not relevant |  |
| Nahed-Toral, J.,<br>Sanchez-Munoz, B., Mena,<br>Y., Ruiz-Rojas, J.,<br>Aguilar-Jimenez, R., Castel,<br>J.M., de Asis Ruiz, F.,<br>Orantes-Zebadua, M.,<br>Manzur-Cruz, A.,<br>Cruz-Lopez, J.,<br>Delgadillo-Puga, C. | Potential for conversion of agrosilvopastoral systems of dairy cattle to the organic production model in south eastern mexico            | 2012 | Scopus,<br>Web of Science | not relevant |  |
| Nahed-Toral, J.,<br>Sanchez-Muñoz, B., Mena,<br>Y., Ruiz-Rojas, J.,<br>Aguilar-Jimenez, R., Castel,<br>J.M., De Asis Ruiz, F.,<br>Orantes-Zebadua, M.,<br>Manzur-Cruz, A.,<br>Cruz-Lopez, J.,<br>Delgadillo-Puga, C. | Feasibility of converting agrosilvopastoral systems of dairy cattle to the organic production model in southeastern Mexico               | 2013 | Scopus,<br>Web of Science | not relevant |  |
| Nauta, W.J.; Baars, T.;<br>Saatkamp, H.; Weenink, D.;<br>Roep, D.                                                                                                                                                    | Farming strategies in organic dairy farming: Effects on breeding goal and choice of breed. An explorative study                          | 2009 | Web of Science            | not relevant |  |
| Peigné, J., Messmer, M.,<br>Aveline, A., Berner, A.,<br>Mäder, P., Carcea, M.,<br>Narducci, V., Samson, M.-F.,<br>Thomsen, I.K., Celette, F.,<br>David, C.                                                           | Wheat yield and quality as influenced by reduced tillage in organic farming                                                              | 2014 | Scopus,<br>Web of Science | not relevant |  |
| Ramesh, P., Singh, M., Subba<br>Rao, A.                                                                                                                                                                              | Organic farming: Its relevance to the Indian context                                                                                     | 2005 | Scopus,<br>Web of Science | not relevant |  |
| Rezvanfar, A., Eraktan, G.,<br>Olhan, E.                                                                                                                                                                             | Determine of factors associated with the adoption of organic agriculture among small farmers in Iran                                     | 2011 | Scopus,<br>Web of Science | not relevant |  |
| Riemens, Marleen M.;<br>Groeneveld, Roel M. W.;<br>Kropff, Martin J. J.; Lotz,<br>Lambertus A. P.; Renes,<br>Reint Jan; Sukkel, Wijnand;<br>van der Weide, Rommie Y.                                                 | Linking Farmer Weed Management Behavior with Weed Pressure: More than Just Technology                                                    | 2010 | Web of Science            | not relevant |  |
| Rigby, D; Young, T; Burton,<br>M                                                                                                                                                                                     | The development of and prospects for organic farming in the UK                                                                           | 2001 | Web of Science            | not relevant |  |
| Roth, F.X., Böhmer, B.M.                                                                                                                                                                                             | Feeding strategies for laying hens in housing systems with open-air runs according to organic farming principles                         | 2008 | Scopus,<br>Web of Science | not relevant |  |
| Saini, S.K., Pandey, S.T.                                                                                                                                                                                            | Organic farming: Development and strategies in Indian perspective                                                                        | 2009 | Scopus,<br>Web of Science | not relevant |  |
| Stamou, G.P., Argyropoulou,<br>M.D., Tsiafouli, M.A.,<br>Monokrousos, N., Sgardelis,<br>S.P., Papatheodorou, E.M.                                                                                                    | The study of secondary successional patterns in soil using network analysis: The case of conversion from conventional to organic farming | 2011 | Scopus,<br>Web of Science | not relevant |  |
| Stern, S., Heyer, A.,<br>Andersson, H.K., Rydhmer,                                                                                                                                                                   | Production Results and Technological Meat Quality for Pigs in Indoor and Outdoor Rearing Systems                                         | 2003 | Scopus,<br>Web of         | not relevant |  |

|                                                                                                                              |                                                                                                                                            |      |                        |              |
|------------------------------------------------------------------------------------------------------------------------------|--------------------------------------------------------------------------------------------------------------------------------------------|------|------------------------|--------------|
| L., Lundström, K.                                                                                                            |                                                                                                                                            |      | Science                |              |
| Sundrum, A., Aragon, A., Schulze-Langenhorst, C., Bütfering, L., Henning, M., Stalljohann, G.                                | Effects of feeding strategies, genotypes, sex, and birth weight on carcass and meat quality traits under organic pig production conditions | 2011 | Scopus, Web of Science | not relevant |
| Teshfam, M., Vahdatpour, T., Nazeradl, K., Ahmadiasl, N.                                                                     | Effects of feed additives on growth-related hormones and performance of Japanese quail ( <i>Coturnix japonica</i> )                        | 2011 | Scopus                 | not relevant |
| Thamaga-Chitja, J., Hendriks, S.                                                                                             | Emerging issues in smallholder organic production and marketing in South Africa                                                            | 2008 | Scopus, Web of Science | not relevant |
| Vaarst, M; Thamsborg, SM; Bennedsgaard, TW; Houe, H; Enevoldsen, C; Aarestrup, FM; de Snoo, A                                | Organic dairy farmers' decision making in the first 2 years after conversion in relation to mastitis treatments                            | 2003 | Web of Science         | not relevant |
| Vesely, M., Šarapatka, B.                                                                                                    | Effects of conversion to organic farming on carabid beetles (Carabidae) in experimental fields in the Czech Republic                       | 2008 | Scopus, Web of Science | not relevant |
| Wedryk, S., Cardina, J.                                                                                                      | Evaluation of tef as a smother crop during transition to organic management                                                                | 2012 | Scopus, Web of Science | not relevant |
| Wedryk, S., Felix, J., Doohan, D., Cardina, J.                                                                               | Strategies for weed suppression and improving soil fertility during transition to organic vegetable production                             | 2012 | Scopus, Web of Science | not relevant |
| Werner, M.R.                                                                                                                 | Soil quality characteristics during conversion to organic orchard management                                                               | 1997 | Scopus                 | not relevant |
| Mzoughi, Naoufel                                                                                                             | Do organic farmers feel happier than conventional ones? An exploratory analysis                                                            | 2014 | Web of Science         | not relevant |
| Delmotte, Sylvestre, Jean-Marc, B., Jean-Claude, M., Christophe, L.P., Jacques, W., Phillipe, C., Alain, S., Santiago, L.-R. | Participatory integrated assessment of scenarios for organic farming at different scales in Camargue, France                               | 2016 | Scopus                 | not relevant |

## Supplementary 2: Questionnaire to Farmers

**Table S2.** Questionnaire to Farmers: Questionnaire which was sent out on February 9<sup>th</sup>, 2016 via e-mail to the farmers before conducting the interviews.

| Nr. | Question                                                                                          | Answer                                                                                                                                                                                                                                                                                                                                                                                                                                                                             |
|-----|---------------------------------------------------------------------------------------------------|------------------------------------------------------------------------------------------------------------------------------------------------------------------------------------------------------------------------------------------------------------------------------------------------------------------------------------------------------------------------------------------------------------------------------------------------------------------------------------|
| 1   | How many hectares of vineyards does your estate manage?                                           |                                                                                                                                                                                                                                                                                                                                                                                                                                                                                    |
| 2   | Which grapes do you grow on how many hectares?                                                    |                                                                                                                                                                                                                                                                                                                                                                                                                                                                                    |
| 3   | How many bottles do you produce each year?                                                        |                                                                                                                                                                                                                                                                                                                                                                                                                                                                                    |
| 4   | How many people are employed at your estate?                                                      |                                                                                                                                                                                                                                                                                                                                                                                                                                                                                    |
| 5   | What do you do with your grapes?                                                                  | <input type="checkbox"/> Estate processed<br><input type="checkbox"/> Sold<br><input type="checkbox"/> Cooperation<br><input type="checkbox"/> other (please name): _____                                                                                                                                                                                                                                                                                                          |
| 6   | Does your estate have any certifications which you can label your products with? Please indicate. | <input type="checkbox"/> Yes<br><input type="checkbox"/> No                                                                                                                                                                                                                                                                                                                                                                                                                        |
| 6.1 | If yes, which and since when?                                                                     | <input type="checkbox"/> VdP, since ____<br><input type="checkbox"/> DLG, since ____<br><input type="checkbox"/> Organic label (EG-Öko), since ____<br><input type="checkbox"/> Ecovin, since ____<br><input type="checkbox"/> Fair Choice, since ____<br><input type="checkbox"/> Fair'n Green, since ____<br><input type="checkbox"/> Demeter, since ____<br><input type="checkbox"/> Vegan-label, since ____<br><input type="checkbox"/> Other (please name): _____, since ____ |

|    |                                                                                                                                                                 |                                                                                                                                                                                                                                                                                                                                                                                                                                                                                                                                                          |
|----|-----------------------------------------------------------------------------------------------------------------------------------------------------------------|----------------------------------------------------------------------------------------------------------------------------------------------------------------------------------------------------------------------------------------------------------------------------------------------------------------------------------------------------------------------------------------------------------------------------------------------------------------------------------------------------------------------------------------------------------|
| 7  | What are the 3 most important business objectives of your estate ( <i>1 most important, 3 least important</i> )?                                                | (1)<br>(2)<br>(3)                                                                                                                                                                                                                                                                                                                                                                                                                                                                                                                                        |
| 8  | What are the 3 most important objectives in the vineyard management of your estate ( <i>1 most important, 3 least important</i> )?                              | (1)<br>(2)<br>(3)                                                                                                                                                                                                                                                                                                                                                                                                                                                                                                                                        |
| 9  | Which are the 3 most important sources of information in relation to farming decisions for your estate ( <i>1 most important, 3 least important</i> )?          | (1)<br>(2)<br>(3)                                                                                                                                                                                                                                                                                                                                                                                                                                                                                                                                        |
| 10 | Which are the top 3 challenges in the wine sector in Pfalz/Rheinessen you think will occur in the next 20 years ( <i>1 most important, 3 least important</i> )? | (1)<br>(2)<br>(3)                                                                                                                                                                                                                                                                                                                                                                                                                                                                                                                                        |
| 11 | Since when are you working for your estate?                                                                                                                     |                                                                                                                                                                                                                                                                                                                                                                                                                                                                                                                                                          |
| 12 | What's your current role at your estate?                                                                                                                        |                                                                                                                                                                                                                                                                                                                                                                                                                                                                                                                                                          |
| 13 | What are the best 3 aspects of your job ( <i>1 most important, 3 least important</i> )?                                                                         | (1)<br>(2)<br>(3)                                                                                                                                                                                                                                                                                                                                                                                                                                                                                                                                        |
| 14 | In which year are you born?                                                                                                                                     |                                                                                                                                                                                                                                                                                                                                                                                                                                                                                                                                                          |
| 15 | What is your gender?                                                                                                                                            | <input type="checkbox"/> Male<br><input type="checkbox"/> Female<br><input type="checkbox"/> No answer                                                                                                                                                                                                                                                                                                                                                                                                                                                   |
| 16 | What is your highest level of education completed? <sup>1</sup> Please indicate.                                                                                | <input type="checkbox"/> Secondary general school-leaving certificate<br><input type="checkbox"/> Intermediate school-leaving certificate<br><input type="checkbox"/> Fachhochschule or University entrance qualification<br><input type="checkbox"/> Apprenticeship (Dual system) qualification<br><input type="checkbox"/> Qualification from trade and technical schools<br><input type="checkbox"/> Bachelor<br><input type="checkbox"/> Master<br><input type="checkbox"/> Diploma<br><input type="checkbox"/> Others ( <i>please name</i> ): _____ |

<sup>1</sup> Answers taken from the statistical authority in Germany (German and English version): <https://www.destatis.de/EN/FactsFigures/SocietyState/EducationResearchCulture/EducationalLevel/Tables/EducationalAttainmentPopulationGermany.html>, 16 February 2016.

### Supplementary 3: Interview Questions

Date and Time:

Region:

Estate:

Setting:

Participant:

#### (A) Challenges of the wine sector

Thank you again for taking the time to fill in the questionnaire I sent out.

One of the questions was which challenges farmers expect to occur in the next 20 years in the wine-sector in Pfalz and Rheinessen. From the answers of all participants I identified three main challenges. I will ask you about these now.

1. Which measures can farmers, in your opinion, choose to meet these challenges?
    - a. Climate change (increasing temperatures, extreme weather events like hail & frost)
    - b. Sustainability (CO<sub>2</sub> balance, being able to persist in the future)
    - c. Marketing (international competition, standing on the market, sharpening of the product profiles of the regions)
  2. How do you think organic farming practices would meet these challenges?
    - a. Climate change (increasing temperatures, extreme weather events like hail & frost)
    - b. Sustainability (and CO<sub>2</sub> balance, being able to persist in the future)
    - c. Marketing (international competition, standing on the market, sharpening of the product profiles of the regions)
- 

## **(B) Organic farming**

*Now I want to ask you some questions about organic wine production.*

### **If interviewing a conventional estate:**

3. Has your estate ever considered adopting organic certification?
  - a. *If yes*, which challenges did you consider?
  - b. *If yes*, which benefits did you consider?
  - c. *If yes*, why did you decide against adopting organic certification or are you in the process of converting?
  - d. *If not*, which motivations do you have to use conventional farming practices?
  - e. *If not*, in which circumstances would you consider producing organic wine?

### **If interviewing an organic estate:**

4. Which motivations did you have to convert to organic farming practices?
  5. Which were the challenges you had when converting to organic farming practices?
- 

## **(C) Financial capital**

### **If interviewing a conventional estate:**

6. Are you aware of any subsidies to grow organic grapes?
  - a. *If yes*, from where and how much for what?
7. How would you expect your profit to change if producing certified organic wine? Why?

### **If interviewing an organic estate:**

8. Did or do you receive any subsidies from the EU, Germany or any other institution?
    - a. *If yes*, from whom and what?
    - b. *If no*, why not?
  9. How did your profit change since you are producing certified organic wine? Why?
- 

## **(D) Human and social capital**

10. How would you describe a typical customer (use "Abnehmer" in German) of yours?



- a. Where does a typical customer of yours buy his or her wine?
  11. How do you expect your wine-selling will develop in the next 5 years? (amount, price, share of customers)
- 

**(E) Natural capital**

**If interviewing a conventional estate:**

12. What are the 3 most important objectives for managing your vineyards for the next 20 years?
13. Which challenges could organic farming practices have for you in the vineyard?
14. What benefits could organic farming practices have for you in the vineyard?

**If interviewing an organic estate:**

15. What are the 3 most important objectives for managing your vineyards for the next 20 years?
  16. Which challenges do organic farming practices have for you in the vineyard?
  17. What benefits do organic farming practices have for you in the vineyard?
- 

18. Do you want to add anything?
